# Supplementary material
Source: publisher figshare collection journal article supplement (https://acs.figshare.com/ndownloader/files/3942841)
Supplement: Supplementary file 1 [file 3942841]

# **Modifying Effect of Imidazolium-Based Ionic Liquids on Surface Activity and Self-Assembled Nano Structures of Sodium Dodecyl Sulfate (SDS)**

Soheila Javadian<sup>a,\*</sup>, Fayeze Nasiri<sup>a</sup>, Akbar Heydari<sup>a</sup>, Ali Yousefi<sup>a</sup> and  
Afshin Asadzadeh Shahir<sup>a,b</sup>

<sup>a</sup> Department of Chemistry, Faculty of Science, Tarbiat Modares University, P.O. Box 14115-  
175, Tehran, Iran

<sup>b</sup> Division of Chemical Engineering, School of Engineering, The University of Queensland,  
Brisbane, 4072 Queensland, Australia

\*Corresponding author e-mail: Javadian\_s@modares.ac.ir

Fax: 0098(21)82883455

a)

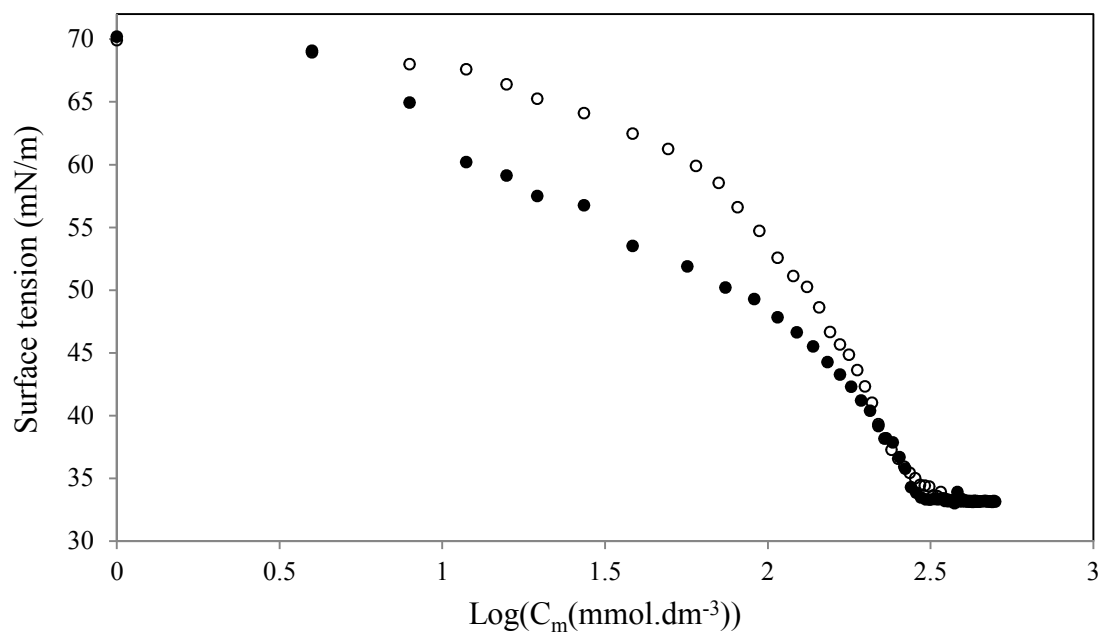

b)

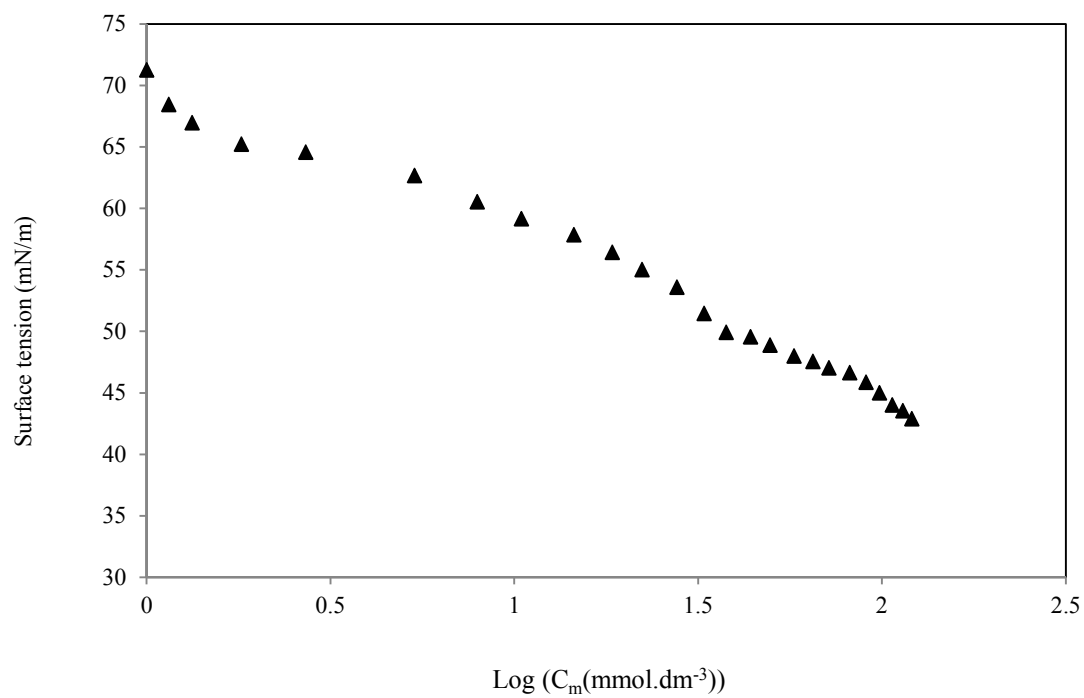

**S.1.** Tensiometric plot of (●) HMIIm Br, (○) HMIIm Cl and (▲) BMIm Br

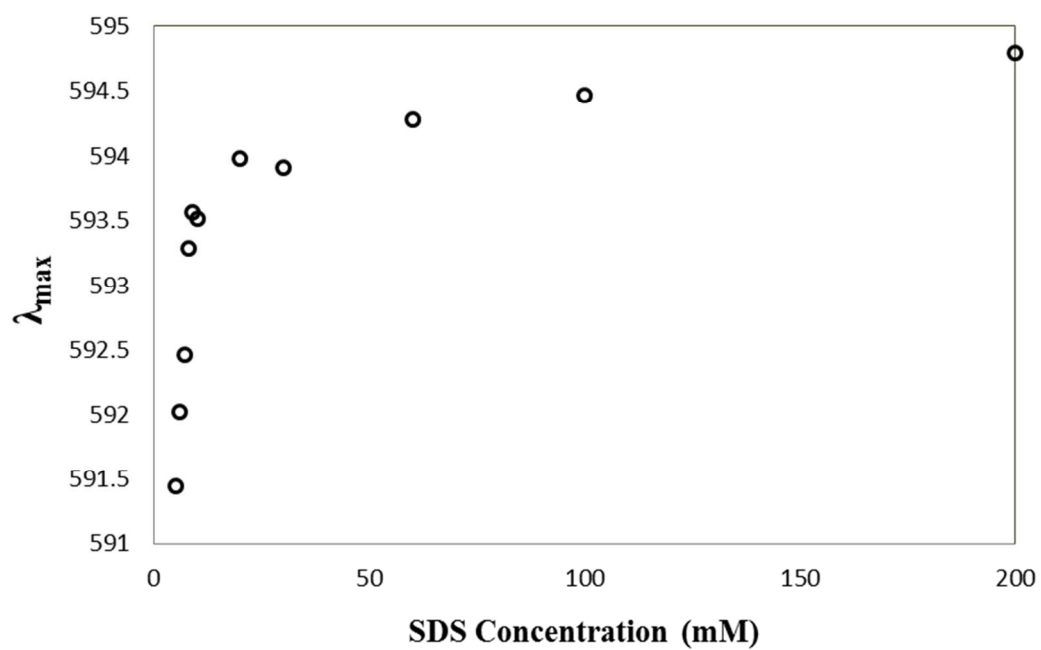

**S.2.** Variation of Crystal Violet maximum absorbance wavelength with SDS concentration in the absence of ILs.

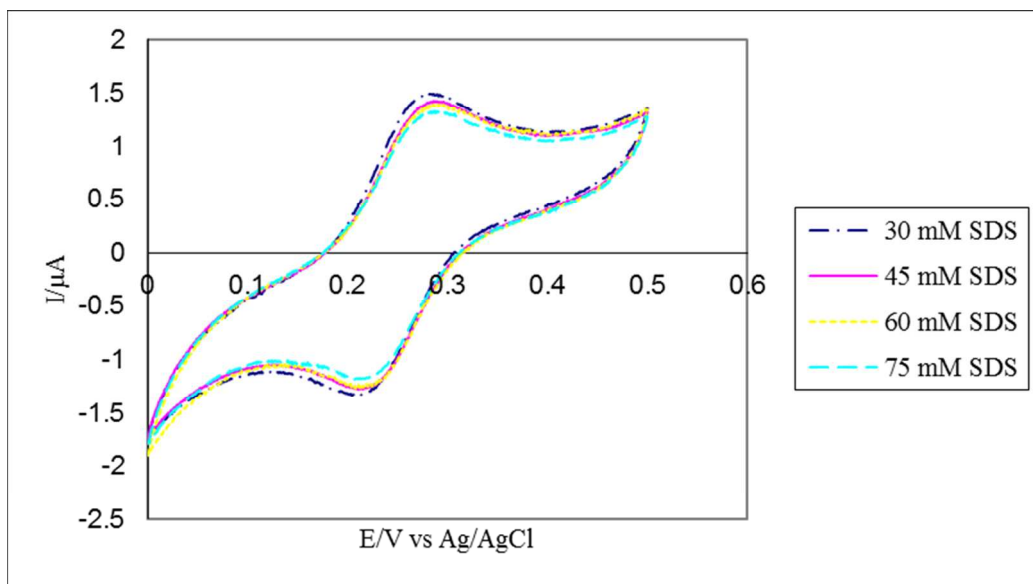

**S.3.** The obtained voltammograms for various SDS concentrations in the presence of 0.5 % w/w of BMImBr. Scan rate is  $100 \text{ mV s}^{-1}$ ,  $[\text{NaCl}] = 0.05 \text{ M}$ , and  $T = 298 \text{ K}$ .

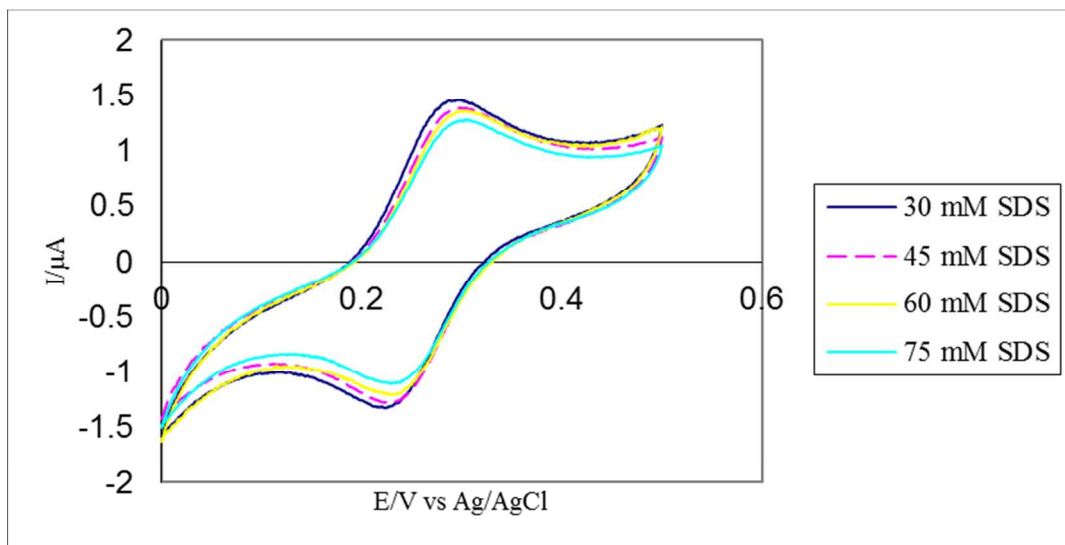

**S.4.** The obtained voltammograms for various SDS concentrations in the presence of 1 % w/w of BMImBr. Scan rate is  $100 \text{ mV s}^{-1}$ ,  $[\text{NaCl}] = 0.05 \text{ M}$ , and  $T = 298 \text{ K}$ .

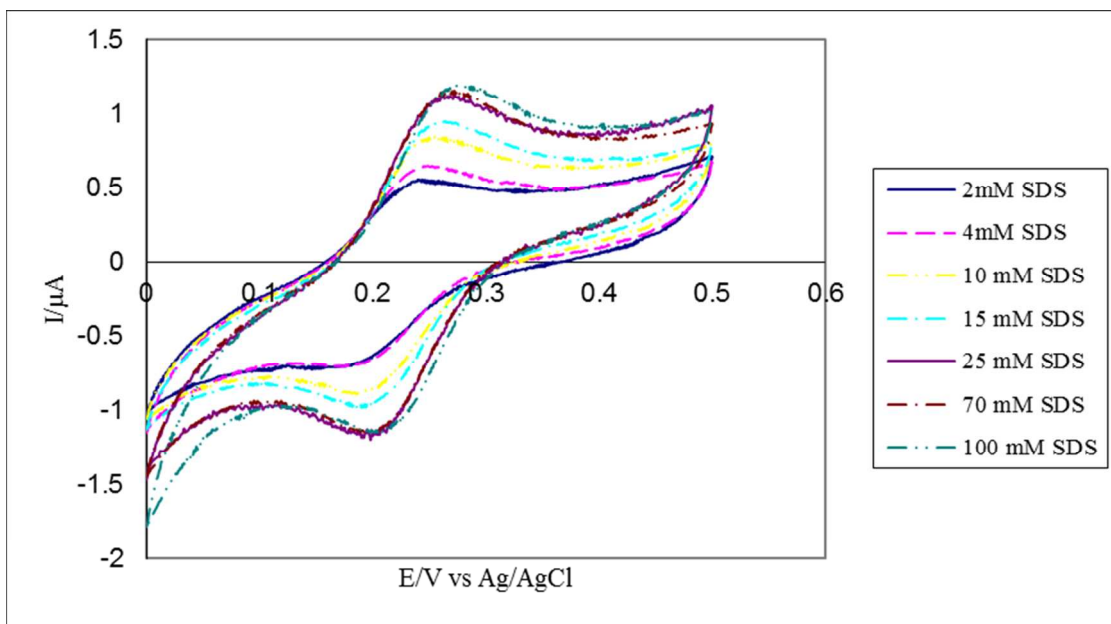

**S.5.** The obtained voltammograms for various SDS concentrations in the presence of 0.5 % w/w of HMImBr. Scan rate is  $100 \text{ mV s}^{-1}$ ,  $[\text{NaCl}] = 0.05 \text{ M}$ , and  $T = 298 \text{ K}$ .

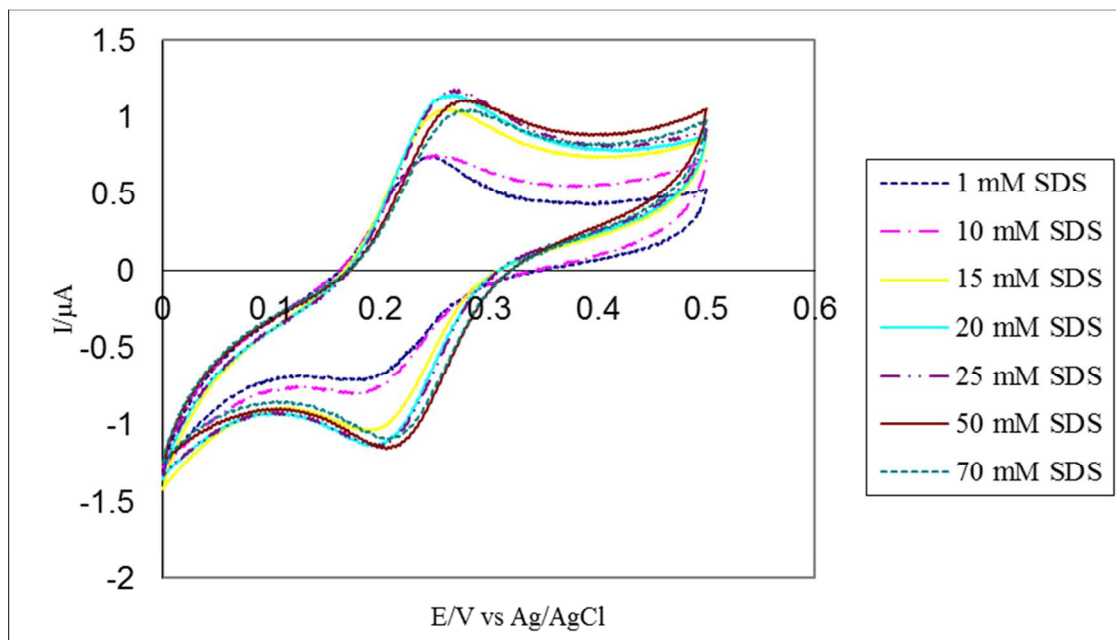

**S.6.** The obtained voltammograms for various SDS concentrations in the presence of 1 % w/w of HMImBr. Scan rate is  $100 \text{ mV s}^{-1}$ ,  $[\text{NaCl}] = 0.05 \text{ M}$ , and  $T = 298 \text{ K}$ .

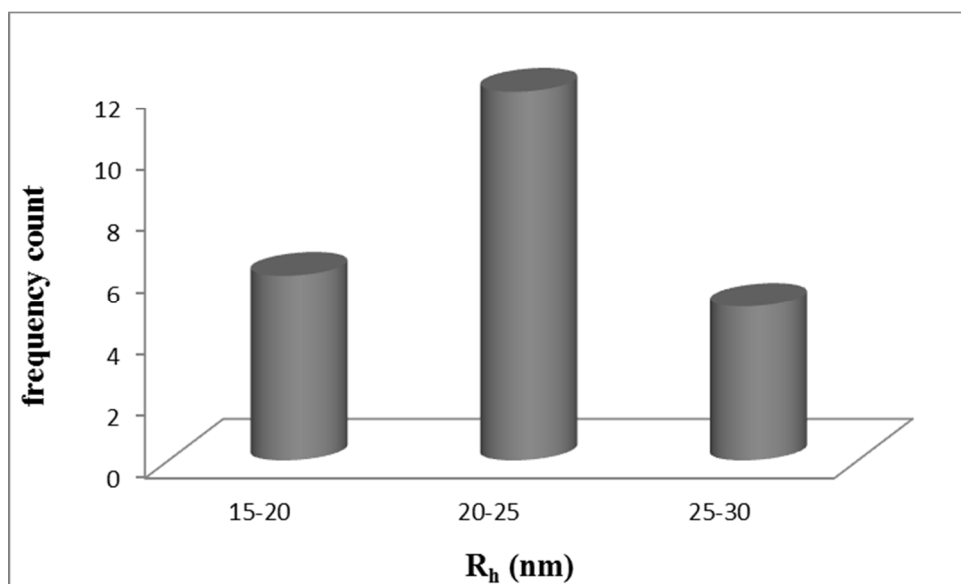

**S.7.** Size distribution of the aggregates extracted from the TEM image for 7 mM SDS solution in the presence of 1 % w/w of HMIImBr

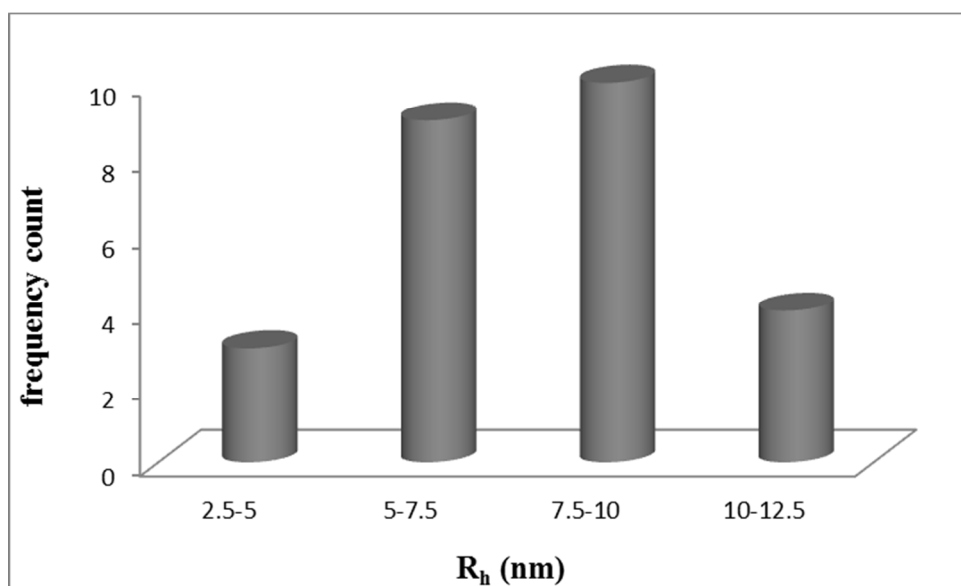

**S.8.** Size distribution of the aggregates extracted from the TEM image for 70 mM SDS solution in the presence of 1 % w/w of HMIImBr
